# Supplementary material for: Tumor necrosis factor-α −308 G/A polymorphism and risk of sepsis, septic shock, and mortality: an updated meta-analysis
Source: PubMed Central journal article supplement (PMC5706923; doi:10.18632/oncotarget.20862), 2017-09-13
Supplement: oncotarget-08-94910-s001.pdf [file oncotarget-08-94910-s001.pdf]

# Tumor necrosis factor- $\alpha$ -308 G/A polymorphism and risk of sepsis, septic shock, and mortality: an updated meta-analysis

## SUPPLEMENTARY MATERIALS

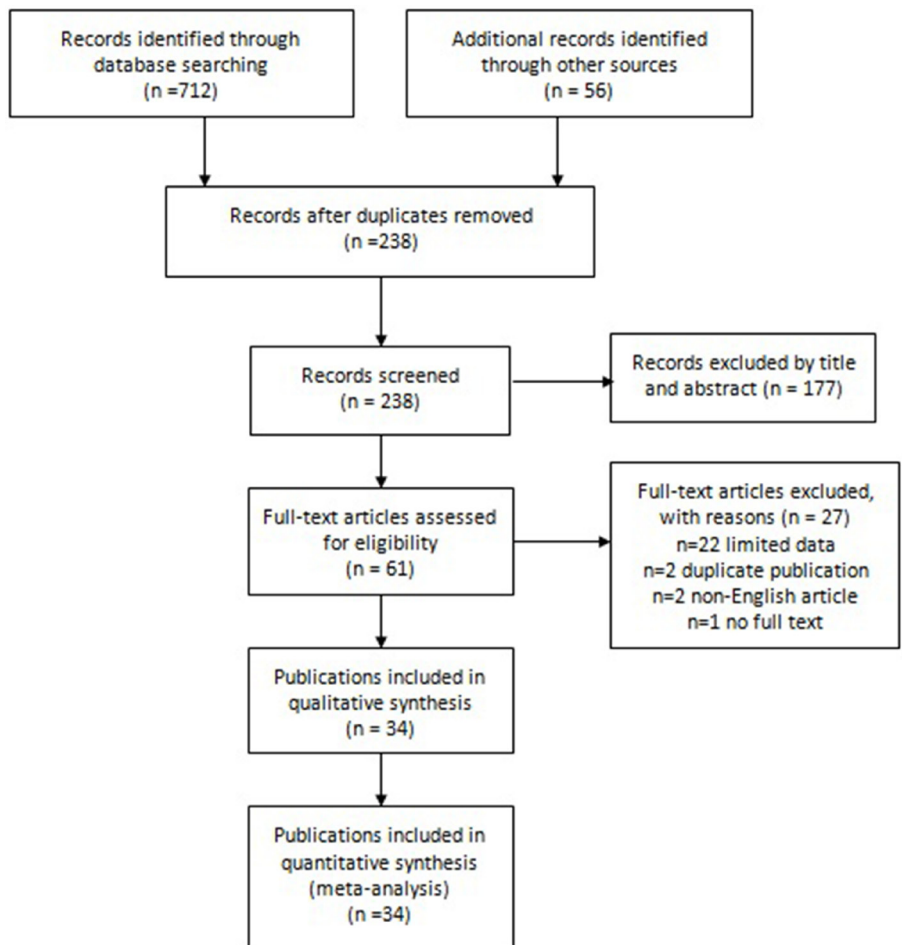

Supplementary Figure 1. Flow diagram of study identification.

Supplementary Table 1: Distribution of Tumor necrosis factor- $\alpha$  -308 genotype and allele among cases and controls. See\_Supplementary\_Table 1

**Supplementary Table 2: Quality assessment of included studies**

| Author/Year                  | HWE | Primer | Blinding | Sepsis Definition | Sepsis definition in detail                                                     |
|------------------------------|-----|--------|----------|-------------------|---------------------------------------------------------------------------------|
| Allam et al. 2015            | +   | -      | -        | +                 | Defined by positive blood culture                                               |
| Cardoso et al. 2015          | +   | -      | -        | +                 | ACCP-SCCM and International Sepsis Definitions Conference                       |
| Feng et al. 2015             | +   | -      | -        | +                 | International Guidelines for Management of Severe Sepsis and Septic Shock       |
| Gupta et al. 2015            | +   | -      | -        | +                 | Defined by SIRS and infection                                                   |
| Baghel et al. 2014           | -   | +      | -        | +                 | ACCP-SCCM                                                                       |
| Kothari et al. 2013          | +   | +      | -        | +                 | Defined by specific culture                                                     |
| Susantitaphong et al. 2013   | -   | +      | +        | +                 | International Sepsis Definitions Conference                                     |
| Azevedo et al. 2012          | +   | -      | -        | +                 | International Pediatric Sepsis Consensus Conference                             |
| Song et al. 2012             | +   | +      | -        | +                 | ACCP-SCCM                                                                       |
| Duan et al. 2011             | +   | +      | -        | +                 | Defined by evidence of infection and SIRS criteria                              |
| Härtel et al. 2011           | +   | +      | -        | +                 | Defined by positive blood culture and at least two clinical signs               |
| Paskulin et al. 2011         | +   | +      | +        | +                 | ACCP-SCCM                                                                       |
| Carregaro et al. 2010        | +   | -      | -        | +                 | ACCP-SCCM                                                                       |
| Gu et al. 2010               | +   | -      | -        | +                 | Defined by clinical evidence of infection, body temperature and leukocyte count |
| Menges et al. 2008           | +   | +      | +        | +                 | ACCP-SCCM                                                                       |
| Jessen et al. 2007           | +   | +      | +        | +                 | ACCP-SCCM                                                                       |
| McDaniel et al. 2007         | NA  | +      | -        | +                 | Defined by SIRS and Positive blood culture                                      |
| Garnacho-Montero et al. 2006 | -   | +      | -        | +                 | ACCP-SCCM                                                                       |
| Sipahi et al. 2006           | +   | +      | -        | +                 | ACCP-SCCM                                                                       |
| Schueller et al 2006         | +   | +      | +        | +                 | Defined by positive blood culture, leukocytes count, CRP, and clinic sign       |
| Nakada et al. 2005           | +   | +      | -        | +                 | ACCP-SCCM                                                                       |
| Gordon et al. 2004           | +   | +      | +        | +                 | ACCP-SCCM                                                                       |
| Jaber et al. 2004            | NA  | +      | +        | +                 | NA                                                                              |
| Balding et al. 2003          | +   | +      | -        | -                 | -                                                                               |
| Calvano et al. 2003          | +   | +      | +        | +                 | Defined by SIRS and positive cultures                                           |
| Schaaf et al. 2003           | +   | +      | -        | +                 | ACCP-SCCM                                                                       |
| Treszl et al. 2003           | +   | +      | -        | +                 | Defined by symptom, laboratory finding and blood culture                        |
| Zhang et al. 2003            | -   | +      | -        | +                 | ACCP-SCCM                                                                       |
| Zhang et al. 2003            | -   | +      | -        | +                 | ACCP-SCCM                                                                       |
| Majetschak et al. 2002       | +   | +      | -        | +                 | ACCP-SCCM                                                                       |
| Appoloni et al. 2001         | NA  | -      | -        | -                 | -                                                                               |
| Waterer et al. 2001          | -   | +      | +        | +                 | ACCP-SCCM                                                                       |
| Mira et al. 1999             | NA  | +      | +        | +                 | ACCP-SCCM                                                                       |
| Nuntayanuwat et al. 1999     | +   | +      | -        | +                 | Defined by positive blood culture                                               |

+ Yes; - No; ACCP: American College of Chest Physicians; NA: Not available; SCCM: Society of Critical Care Medicine.
